# Supplementary material for: Trichoderma: Population Structure and Genetic Diversity of Species with High Potential for Biocontrol and Biofertilizer Applications
Source: Preprints.org preprint supplement (doi:10.20944/preprints202402.0354.v1), 2024-02-06
Supplement: Supplementary file 1 [file supplementary]

Table S2. Isolation of endophytic species of *Trichoderma* from different geographic regions<sup>a</sup>

| Country                                        | Host                         | Total isolates <sup>a</sup> | asp/aso <sup>c</sup> | Harz. Complex Clade <sup>d</sup> | virens | atroviride | hamatum | Total and (%) | Reference <sup>e</sup>               | satragosum | reesei | T. sp. <sup>f</sup> | pararesei | theobromicola | spirale | longibrachiatum | koninglopsi | koningii | canadense | viticola | petersenii | breve | tomentosum | T. flagellatum | gamsii | orientale | acranum | brasiliensis | heveae | cerinum | viridescens complex | deliquescons | hirsutum | fertile | divascons | brevcompactum |
|------------------------------------------------|------------------------------|-----------------------------|----------------------|----------------------------------|--------|------------|---------|---------------|--------------------------------------|------------|--------|---------------------|-----------|---------------|---------|-----------------|-------------|----------|-----------|----------|------------|-------|------------|----------------|--------|-----------|---------|--------------|--------|---------|---------------------|--------------|----------|---------|-----------|---------------|
| North America                                  |                              |                             |                      |                                  |        |            |         |               |                                      |            |        |                     |           |               |         |                 |             |          |           |          |            |       |            |                |        |           |         |              |        |         |                     |              |          |         |           |               |
| Canada                                         | Grapevines                   | 29                          | 0/4                  | 8                                | 0      | 7          | 0       | 19 (66)       | Pollard-Flamand et al., 2022         |            |        |                     |           |               |         |                 | 2           | 4        | 3         |          |            |       | 1          |                |        |           |         |              |        |         |                     |              |          |         |           |               |
| South America                                  |                              |                             |                      |                                  |        |            |         |               |                                      |            |        |                     |           |               |         |                 |             |          |           |          |            |       |            |                |        |           |         |              |        |         |                     |              |          |         |           |               |
| Brazil                                         | Rubber trees                 | 30                          | 0                    | 0                                | 0      | 0          | 0       | 0             | Nascimento et al. 2023               |            |        | 16                  |           |               |         |                 |             |          |           |          |            |       |            |                |        |           | 7       | 4            | 3      |         |                     |              |          |         |           |               |
| Brazil                                         | Cerrado-Caatinga ecotone     | 19                          | 0                    | 0                                | 0      | 0          | 0       | 0             | Morais et al. 2022                   |            |        | 6                   |           |               | 1       | 6               |             |          |           |          |            |       |            |                | 6      |           |         |              |        |         |                     |              |          |         |           |               |
| Peru                                           | wild rubber tree             | 39                          | 0                    | 31                               | 0      | 0          | 0       | 31 (79)       | Gazis and Chaverri, 2010             |            |        |                     |           |               |         |                 | 8           |          |           |          |            |       |            |                |        |           |         |              |        |         |                     |              |          |         |           |               |
| Europe                                         |                              |                             |                      |                                  |        |            |         |               |                                      |            |        |                     |           |               |         |                 |             |          |           |          |            |       |            |                |        |           |         |              |        |         |                     |              |          |         |           |               |
| UK                                             | various garden trees         | 40                          | 0                    | 15                               | 1      | 0          | 4       | 20 (50)       | Rees et al. 2022                     |            |        |                     |           | 1             | 1       |                 |             |          |           |          |            |       |            |                |        |           |         |              |        | 12      | 1                   | 1            | 1        | 1       | 2         |               |
| Hungary                                        | Grapvines                    | 10                          | 0                    | 8                                | 0      | 0          | 0       | 8 (80)        | Kovács et al., 2021                  |            |        |                     |           |               |         |                 |             |          |           |          |            |       |            | 1              | 1      |           |         |              |        |         |                     |              |          |         |           |               |
| Africa                                         |                              |                             |                      |                                  |        |            |         |               |                                      |            |        |                     |           |               |         |                 |             |          |           |          |            |       |            |                |        |           |         |              |        |         |                     |              |          |         |           |               |
| Ethiopia, Cameroon, Kenya                      | Coffee (cultivated and wild) | 76                          | 0                    | 46                               | 1      | 1          | 3       | 51 (67)       | Rodríguez et al., 2021               |            |        |                     | 2         | 9             | 3       | 7               |             |          |           |          | 2          | 2     |            |                |        |           |         |              |        |         |                     |              |          |         |           |               |
| Ethiopia                                       | Coffee                       | 48                          | 0                    | 14                               | 0      | 0          | 20      | 14 (48)       | Mulaw et al., 2013                   |            |        | 4                   |           |               |         |                 |             |          |           |          |            |       | 10         |                |        |           |         |              |        |         |                     |              |          |         |           |               |
| Asia                                           |                              |                             |                      |                                  |        |            |         |               |                                      |            |        |                     |           |               |         |                 |             |          |           |          |            |       |            |                |        |           |         |              |        |         |                     |              |          |         |           |               |
| Malaysia                                       | 35 plant families            | 93                          | 13/22                | 27                               | 22     | 0          | 0       | 84 (90)       | Cummings et al., 2016                | 1          | 1      | 7                   |           |               |         |                 |             |          |           |          |            |       |            |                |        |           |         |              |        |         |                     |              |          |         |           |               |
| Indonesia                                      | <i>Theobroma cacao</i>       | 21                          | 19                   | 0                                | 2      | 0          | 0       | 21 (100)      | Rosmana et al. 2015                  |            |        |                     |           |               |         |                 |             |          |           |          |            |       |            |                |        |           |         |              |        |         |                     |              |          |         |           |               |
| Thailand                                       | Rubber trees                 | 12                          | 3/0                  | 3                                | 2      | 0          | 3       | 11 (92)       | Sirikamonsathien et al. 2023         |            |        |                     |           |               | 1       |                 |             |          |           |          |            |       |            |                |        |           |         |              |        |         |                     |              |          |         |           |               |
| Iran                                           | <i>Vinca</i> sp.             | 7                           | 1/0                  | 0                                | 0      | 0          | 0       | 1 (14)        | Leylaie and Zafari 2018              |            |        |                     |           |               | 4       | 1               |             |          |           |          |            |       |            |                |        |           |         |              |        |         |                     |              |          |         | 1         |               |
| Iran                                           | Cupressaceae family plants   | 5                           | 0                    | 0                                | 0      | 4          | 0       | 4 (80)        | Hosseyni-Moghaddam and Soltani, 2014 |            |        |                     |           |               |         |                 | 1           |          |           |          |            |       |            |                |        |           |         |              |        |         |                     |              |          |         |           |               |
| Total <sup>g</sup>                             | N/A <sup>h</sup>             | 429                         | 62                   | 152                              | 28     | 12         | 27      | 281 (66)      |                                      | 1          | 1      | 33                  | 2         | 9             | 4       | 6               | 23          | 3        | 4         | 3        | 2          | 2     | 1          | 10             | 1      | 7         | 7       | 4            | 3      | 12      | 1                   | 1            | 1        | 1       | 2         | 1             |
| Detection frequency among studies <sup>h</sup> | N/A                          | N/A                         | 38%                  | 61%                              | 38%    | 23%        | 30%     |               |                                      | 8%         | 8%     | 30%                 | 8%        | 8%            | 15%     | 23%             | 38%         | 15%      | 8%        | 8%       | 8%         | 8%    | 8%         | 8%             | 8%     | 15%       | 8%      | 8%           | 8%     | 8%      | 8%                  | 8%           | 8%       | 8%      | 8%        | 8%            |

<sup>a</sup> Compilation of surveys published in the past 20 years that used ref-1a for *Trichoderma* species identification. Surveys were specific for *Trichoderma* isolates and all species listed in column headings are from the genus *Trichoderma*.

<sup>b</sup> Total number of *Trichoderma* isolates (of all species) identified in this study.

<sup>c</sup> Isolates from *T. asperellum* and *T. asperelloides* are grouped together because *T. asperelloides* is often misidentified as *T. asperellum* due to highly similar DNA sequences and identical morphology. Additionally, many strains of *T. asperelloides* are incorrectly deposited in GenBank as *T. asperellum*.

<sup>d</sup> Harzianum Complex Clade species. Isolates from the different Harzianum complex Species Clad are not broken down into individual species as isolates are often misidentified as *T. harzianum* and also deposited in GenBank as *T. harzianum*.

<sup>e</sup> Reference for the information in this row.

<sup>f</sup> T. sp., *Trichoderma* sp.

<sup>g</sup> Totals for information in each respective column.

<sup>h</sup> Frequency of detection of this species in the different studies collectively. (Number of studies where this species was isolated)/(total number of studies) X 100.

<sup>i</sup> N/A, Not applicable.

References

Cummings NJ, Ambrose A, Braithwaite M et al. (2016) Diversity of root-endophytic *Trichoderma* from Malaysian Borneo. *Mycol Prog* 15. <https://doi.org/10.1007/s11557-016-1192-x>

Gazis R, Chaverri P (2010) Diversity of fungal endophytes in leaves and stems of wild rubber trees (*Hevea brasiliensis*) in Peru. *Fungal Ecol*. 3:240–254.

Hosseyni-Moghaddam MS, Soltani J (2014) Bioactivity of endophytic *Trichoderma* fungal species from the plant family Cupressaceae. *Ann Microbiol* 64:753–761. <https://doi.org/10.1007/s13213-013-0710-1>

Kovács C, Csótó A, Pál K, Nagy A, Fekete E, Karaffa L et al. (2021). The biocontrol potential of endophytic *Trichoderma* fungi isolated from Hungarian grapevines. Part I. isolation, identification and in vitro studies. *Pathogens* 10:1612. <https://doi.org/10.3390/pathogens10121612>

Leylaie S, Zafari D (2018) Antiproliferative and antimicrobial activities of secondary metabolites and phylogenetic study of endophytic *Trichoderma* species from *Vinca* plants. *Front. Microbiol*. 9, 1484.

Morais EM, Silva AAR, Sousa FWA, Azevedo IMB, Silva HF (2022) Endophytic *Trichoderma* strains isolated from forest species of the Cerrado-Caatinga ecotone are potential biocontrol agents against crop pathogenic fungi. *PLoS One*. 17(4):e0265824. <https://doi.org/10.1371/journal.pone.0265824>.

Mulaw TB, Druzhinina IS, Kubicek CP, Atanasova L. (2013) Novel Endophytic *Trichoderma* spp. Isolated from Healthy Coffee arabica Roots are Capable of Controlling Coffee Tracheomycosis. *Diversity* 5(4):750–766. <https://doi.org/10.3390/d5040750>

Nascimento Brito V, Lana Alves J, Sirio Araújo K, de Souza Leite T, Borges de Queiroz C, et al. (2023) Endophytic *Trichoderma* species from rubber trees native to the Brazilian Amazon, including four new species. *Front Microbiol* 14:1095199. <https://doi.org/10.3389/fmicb.2023.1095199>

Pollard-Flamand J, Boulé J, Hart M, Urbez-Torres JR (2022) Biocontrol activity of *Trichoderma* species isolated from grapevines in British Columbia against *Botryosphaeria* Dieback Fungal Pathogens. *J. Fungi* 8:409. <https://doi.org/10.3390/jof8040409>

Rees HJ, Bashir N, Drakulic J, Cromey MG, Bailey AM, Foster GD (2021) Identification of native endophytic *Trichoderma* spp. for investigation of in vitro antagonism towards *Armillaria mellea* using synthetic- and plant-based substrates. *J Appl Microbiol* 131(1):392–403. <https://doi.org/10.1111/jam.14938>.

Rodriguez MDCH, Evans HC, Abreu LMD (2021) New species and records of *Trichoderma* isolated as mycoparasites and endophytes from cultivated and wild coffee in Africa. *Sci Rep* 11:56–71. <https://doi.org/10.1038/s41598-021-84111-1>

Rosmana A, Samuels GJ, Ismaiel A et al. (2015) *Trichoderma asperellum*: A Dominant Endophyte Species in Cacao Grown in Sulawesi with Potential for Controlling Vascular Streak Dieback Disease. *Trop. plant pathol*. 40:19–25. <https://doi.org/10.1007/s40858-015-0004-1>

Sirikamonsathien T, Kenji M, Dethoup T (2023) Potential of endophytic *Trichoderma* in controlling Phytophthora leaf fall disease in rubber (*Hevea brasiliensis*). *Biological Control* 179. <https://doi.org/10.1016/j.biocontrol.2023.105175>
